# Supplementary material for: Occurrence of Toxic Metals and Metalloids in Muscle and Liver of Italian Heavy Pigs and Potential Health Risk Associated with Dietary Exposure
Source: MDPI journal article supplement (doi:10.3390/foods11162530), 2022-08-21
Supplement: s1 [file s1]

# SUPPLEMENTARY MATERIAL

*Article*

## **Occurrence of Toxic Metals and Metalloids in Muscle and Liver of Italian Heavy Pigs and Potential Health Risk Associated with Dietary Exposure**

**Sergio Ghidini <sup>1</sup>, Maria Olga Varrà <sup>1,\*</sup>, Lenka Husáková <sup>2</sup>, Giovanni Loris Alborali <sup>3</sup>, Jan Patočka <sup>2</sup>, Adriana Ianieri <sup>1</sup> and Emanuela Zanardi <sup>1</sup>**

<sup>1</sup> Department of Food and Drug, University of Parma, Strada del Taglio 10, 43126 Parma, Italy

<sup>2</sup> Department of Analytical Chemistry, Faculty of Chemical Technology, University of Pardubice, Studentska 573 HB/D, Pardubice, CZ-532 10, Czech Republic

<sup>3</sup> Headquarters, Istituto Zooprofilattico Sperimentale della Lombardia e dell'Emilia-Romagna, Via A. Bianchi 9, 25124 Brescia, Italy

\* Correspondence: mariaolga.varra@unipr.it; Tel.: +39-0521-902-753

**Table S1.**

Agilent 7900 ICP-MS operating conditions.

| Parameter                                 | Setting         |                 |                        |
|-------------------------------------------|-----------------|-----------------|------------------------|
| ICP                                       |                 |                 |                        |
| Plasma mode                               | General purpose |                 |                        |
| Rf power (27 MHz) (W)                     | 1550            |                 |                        |
| Sampling depth (mm)                       | 10              |                 |                        |
| Plasma gas flow (L min <sup>-1</sup> )    | 15              |                 |                        |
| Auxiliary gas flow (L min <sup>-1</sup> ) | 0.9             |                 |                        |
| Nebulizer gas flow (L min <sup>-1</sup> ) | 1.05            |                 |                        |
| Nebulizer pump (rps)                      | 0.1             |                 |                        |
| Spray chamber temperature (°C)            | 2               |                 |                        |
| Mass spectrometer                         | No gas mode     | He mode         | HEHe mode <sup>a</sup> |
| Extract 1 (V)                             |                 | 0               |                        |
| Extract 2 (V)                             | -250            | -245            | -250                   |
| Omega bias (V)                            | -100            | -120            | -110                   |
| Omega lens (V)                            | 9.7             | 12.7            | 12.3                   |
| Cell entrance                             | -30             | -40             | -140                   |
| Cell exit                                 | -50             | -60             | -150                   |
| Deflect (V)                               | 11.6            | 1.6             | -60                    |
| Plate bias                                | -35             | -60             | -150                   |
| Helium flow (mL min <sup>-1</sup> )       | 0               | 6               | 10                     |
| OctP bias                                 | -8              | -18             | -100                   |
| OctP RF                                   |                 | 200             |                        |
| Energy discrimination (V)                 | 5               | 5               | 9                      |
| Number of elements                        | 38 <sup>b</sup> | 12 <sup>c</sup> | 4 <sup>d</sup>         |
| Acquisition                               |                 |                 |                        |
| Points per peak                           | 1               |                 |                        |
| Replicates                                | 3               |                 |                        |
| Sweeps/replicate                          | 100             |                 |                        |
| Total acquisition time (s)                | 75              |                 |                        |

<sup>a</sup> HEHe mode - high energy helium mode; Monitored isotopes (integration time): <sup>b</sup> <sup>7</sup>Li, <sup>11</sup>B, <sup>24</sup>Mg, <sup>66</sup>Zn, <sup>85</sup>Rb, <sup>88</sup>Sr, <sup>89</sup>Y, <sup>90</sup>Zr, <sup>95</sup>Mo, <sup>101</sup>Ru, <sup>103</sup>Rh, <sup>105</sup>Pd, <sup>111</sup>Cd, <sup>118</sup>Sn, <sup>121</sup>Sb, <sup>133</sup>Cs, <sup>138</sup>Ba, <sup>139</sup>La, <sup>140</sup>Ce, <sup>141</sup>Pr, <sup>146</sup>Nd, <sup>147</sup>Sm, <sup>153</sup>Eu, <sup>157</sup>Gd, <sup>159</sup>Tb, <sup>163</sup>Dy, <sup>165</sup>Ho, <sup>166</sup>Er, <sup>172</sup>Yb, <sup>175</sup>Lu, <sup>178</sup>Hf, <sup>185</sup>Re, <sup>195</sup>Pt, <sup>205</sup>Tl, <sup>206+207+208</sup>Pb, <sup>209</sup>Bi, <sup>232</sup>Th, <sup>238</sup>U (all 0.1 s); <sup>c</sup> <sup>23</sup>Na (0.3 s), <sup>27</sup>Al (0.1 s), <sup>39</sup>K, <sup>44</sup>Ca (both 0.3 s), <sup>51</sup>V (1 s), <sup>52</sup>Cr, <sup>55</sup>Mn, <sup>56</sup>Fe, <sup>59</sup>Co, <sup>60</sup>Ni, <sup>63</sup>Cu, <sup>103</sup>Rh (all 0.3 s); <sup>d</sup> <sup>31</sup>P (0.1 s), <sup>75</sup>As, <sup>78</sup>Se (both 1 s), <sup>103</sup>Rh (0.3 s).

**Table S2.**

Mean concentration determinations, % recovery and measurement precision (% RSD) for investigated analytes in certified reference materials (CRMs).

| Element CRM |                                            | Certified value<br>(mg kg <sup>-1</sup> ) | Measured value <sup>a</sup><br>(mg kg <sup>-1</sup> ) | Recovery <sup>b</sup><br>(%) | RSD (%)  |          |
|-------------|--------------------------------------------|-------------------------------------------|-------------------------------------------------------|------------------------------|----------|----------|
|             |                                            |                                           |                                                       |                              | Intraday | Interday |
| Al          | CRM 12-2-04 Wheat bread flour <sup>3</sup> |                                           | 3.2 ± 0.2                                             | 106                          | 2.67     | 4.62     |
|             | CRM12-2-03 Lucerne                         | 330                                       | 365 ± 6                                               | 111                          | 0.85     | 8.35     |
| As          | BCR-CRM 185 Bovine Liver                   | 0.024 ± 0.003                             | 0.0242 ± 0.003                                        | 101                          | 6.81     | 2.69     |
|             | NIST 1566 Oyster Tissue                    | 13.4 ± 1.9                                | 12.5 ± 1.2                                            | 93                           | 4.74     | 2.07     |
|             | CRM 12-2-01 Bovine Liver                   | 0.110 ± 0.016                             | 0.116 ± 0.008                                         | 105                          | 3.48     | 2.32     |
|             | CRM 12-2-04 Wheat bread flour              | 0.017 ± 0.0046                            | 0.0184 ± 0.003                                        | 108                          | 8.12     | 9.52     |
|             | CRM12-2-03 Lucerne                         | 0.262 ± 0.020                             | 0.292 ± 0.009                                         | 111                          | 1.58     | 1.31     |
|             | NCS ZC 73015 Milk Powder                   | 31 ± 7                                    | 29.7 ± 0.2                                            | 96                           | 0.30     | 5.64     |
| Cd          | BCR 184 Bovine muscle                      | 0.013 ± 0.002                             | 0.0131 ± 0.003                                        | 101                          | 9.68     | 6.07     |
|             | BCR-CRM 185 Bovine Liver                   | 0.298                                     | 0.296 ± 0.042                                         | 99                           | 7.12     | 2.28     |
|             | NIST 1577 Bovine Liver                     | 0.097                                     | 0.098 ± 0.004                                         | 101                          | 2.05     | 4.09     |
|             | NIST 1566 Oyster Tissue                    | 3.5 ± 0.4                                 | 3.24 ± 0.03                                           | 93                           | 0.44     | 2.12     |
|             | CRM 12-2-01 Bovine Liver                   | 0.48 ± 0.03                               | 0.46 ± 0.02                                           | 95                           | 1.89     | 2.50     |
|             | CRM 12-2-04 Wheat bread flour              | 0.0415                                    | 0.0381 ± 0.004                                        | 92                           | 4.99     | 0.53     |
|             |                                            | 32                                        |                                                       |                              |          |          |
|             | CRM12-2-03 Lucerne                         | 0.136 ± 0.0065                            | 0.124 ± 0.005                                         | 91                           | 1.84     | 1.70     |
| Cr          | BCR 184 Bovine muscle                      | 0.076                                     | 0.074 ± 0.002                                         | 99                           | 1.28     | 5.85     |
|             | NIST 1577 Bovine Liver                     | 0.053 ± 0.014                             | 0.053 ± 0.009                                         | 100                          | 8.86     | 3.75     |
|             | CRM 12-2-01 Bovine Liver                   | 0.044                                     | 0.044 ± 0.01                                          | 100                          | 12.1     | 7.86     |
|             | NCS ZC 73015 Milk Powder                   | 0.39 ± 0.04                               | 0.38 ± 0.02                                           | 97                           | 2.37     | 4.87     |
|             | CRM12-2-03 Lucerne                         | 0.900                                     | 0.89 ± 0.05                                           | 99                           | 2.75     | 4.90     |
| Cu          | BCR 184 Bovine muscle                      | 2.36 ± 0.06 <sup>c</sup>                  | 2.14 ± 0.16                                           | 91                           | 3.79     | 1.99     |
|             | BCR-CRM 185R Bovine Liver                  | 189 ± 4                                   | 180 ± 6                                               | 95                           | 1.69     | 4.23     |
|             | NIST 1577 Bovine Liver                     | 275.2 ± 4.6                               | 253 ± 9                                               | 92                           | 1.78     | 1.06     |
|             | NIST 1566 Oyster Tissue                    | 63.0 ± 3.5                                | 55.7 ± 0.4                                            | 89                           | 0.32     | 0.42     |
|             | CRM 12-2-01 Bovine Liver                   | 26.3 ± 1.6                                | 25.1 ± 0.49                                           | 98                           | 0.98     | 2.96     |
|             | NCS ZC 73015 Milk Powder                   | 0.51 ± 0.13                               | 0.48 ± 0.02                                           | 94                           | 1.88     | 5.36     |
|             | CRM 12-2-04 Wheat bread flour              | 2.77 ± 0.03                               | 2.69 ± 0.30                                           | 97                           | 5.64     | 2.87     |
|             | CRM12-2-03 Lucerne                         | 11.7 ± 0.75                               | 11.4 ± 1.4                                            | 97                           | 6.14     | 3.19     |
| Fe          | BCR 184 Bovine muscle                      | 79 ± 2                                    | 73.1 ± 8.9                                            | 93                           | 6.11     | 2.56     |
|             | BCR-CRM 185R Bovine Liver                  | 214 ± 5                                   | 197 ± 23                                              | 92                           | 5.85     | 2.25     |
|             | NIST 1577 Bovine Liver                     | 197.94 ± 0.65                             | 189 ± 10                                              | 96                           | 2.75     | 1.23     |
|             | NIST 1566 Oyster Tissue                    | 195 ± 34                                  | 189 ± 26                                              | 97                           | 6.88     | 2.13     |
|             | CRM 12-2-01 Bovine Liver                   | 495 ± 28                                  | 491 ± 59                                              | 99                           | 6.01     | 5.23     |
|             | NCS ZC 73015 Milk Powder                   | 7.8 ± 1.3                                 | 6.9 ± 0.5                                             | 89                           | 3.48     | 6.12     |
|             | CRM 12-2-04 Wheat bread flour              | 23.8 ± 1.5                                | 24.4 ± 1.9                                            | 102                          | 3.99     | 1.81     |
|             | CRM12-2-03 Lucerne                         | 355 ± 18                                  | 371 ± 21                                              | 104                          | 2.77     | 1.42     |

**Table S2.** Continued

| Element CRM |                               | Certified value<br>(mg kg <sup>-1</sup> ) | Measured value <sup>a</sup><br>(mg kg <sup>-1</sup> ) | Recovery <sup>b</sup><br>(%) | RSD (%)  |              |
|-------------|-------------------------------|-------------------------------------------|-------------------------------------------------------|------------------------------|----------|--------------|
|             |                               |                                           |                                                       |                              | Intraday | Interday     |
| Hg          | BCR 185 Bovine Liver          | 0.044 ± 0.003                             | 0.0460 ± 0.0005                                       | 105                          | 0.54     | <sup>d</sup> |
|             | NIST 1577c Bovine Liver       | 5.36 ± 0.17 <sup>c</sup>                  | 5.0 ± 0.4 <sup>c</sup>                                | 93                           | 3.80     | 7.06         |
|             | NIST 1566 Oyster Tissue       | 0.057 ± 0.015                             | 0.0528 ± 0.0004                                       | 93                           | 0.38     | <sup>d</sup> |
|             | CRM 12-2-01 Bovine Liver      | 0.37 ± 0.02                               | 0.35 ± 0.02                                           | 95                           | 3.14     | 5.92         |
| Ni          | BCR 184 Bovine muscle         | 0.270                                     | 0.265 ± 0.017                                         | 98                           | 3.21     | 7.83         |
|             | NIST 1566 Oyster Tissue       | 1.03 ± 0.19                               | 0.99 ± 0.04                                           | 96                           | 1.88     | 3.42         |
|             | CRM 12-2-04 Wheat bread flour | 0.3                                       | 0.28 ± 0.03                                           | 93                           | 4.64     | 7.52         |
|             | CRM12-2-03 Lucerne            | 2.54 ± 0.18                               | 2.81 ± 0.17                                           | 111                          | 3.03     | 5.65         |
| Pb          | CRM 12-2-04 Wheat bread flour | 0.041 ± 0.0078                            | 0.038 ± 0.002                                         | 93                           | 2.62     | 7.23         |
|             | NIST 1577 Bovine Liver        | 0.0628 ± 0.002                            | 0.068 ± 0.002                                         | 109                          | 1.14     | 1.62         |
|             | BCR 184 Bovine muscle         | 0.239 ± 0.011                             | 0.250 ± 0.026                                         | 104                          | 5.28     | 5.53         |
|             | BCR-CRM 185 Bovine Liver      | 0.501 ± 0.027                             | 0.510 ± 0.048 <sup>c</sup>                            | 102                          | 4.71     | 7.23         |
|             | NIST 1566 Oyster Tissue       | 0.480 ± 0.040                             | 0.462 ± 0.010                                         | 96                           | 1.07     | 2.52         |
|             | CRM 12-2-01 Bovine Liver      | 0.71 ± 0.08                               | 0.71 ± 0.11                                           | 100                          | 7.56     | 2.93         |
|             | NCS ZC 73015 Milk Powder      | 0.07 ± 0.02                               | 0.069 ± 0.004                                         | 99                           | 2.68     | 8.35         |
|             | CRM12-2-03 Lucerne            | 1.84 ± 0.17                               | 2.0 ± 0.1                                             | 109                          | 2.48     | 4.75         |
| Sn          | CRM 12-2-04 Wheat bread flour | < 3                                       | 0.30 ± 0.03                                           | <sup>d</sup>                 | 4.67     | 7.22         |
| U           | NIST 1566 Oyster Tissue       | 0.116 ± 0.006                             | 0.115 ± 0.007                                         | 99                           | 3.18     | 4.16         |
|             | NCS ZC 73015 Milk Powder      | 3 <sup>c</sup>                            | 3.05 ± 0.12 <sup>c</sup>                              | 102                          | 1.95     | 4.38         |
| Zn          | BCR 184 Bovine muscle         | 166 ± 3                                   | 149.3 ± 0.8                                           | 90                           | 0.25     | 1.32         |
|             | BCR-CRM 185 Bovine Liver      | 142 ± 3                                   | 132 ± 4                                               | 93                           | 1.37     | 3.63         |
|             | NIST 1577 Bovine Liver        | 181.1 ± 1.0                               | 168 ± 4                                               | 93                           | 1.00     | 1.38         |
|             | NIST 1566 Oyster Tissue       | 852 ± 14                                  | 766 ± 17                                              | 90                           | 1.11     | 0.73         |
|             | CRM 12-2-01 Bovine Liver      | 162 ± 6                                   | 152 ± 8                                               | 94                           | 2.58     | 3.45         |
|             | NCS ZC 73015 Milk Powder      | 34 ± 2                                    | 33.3 ± 1.2                                            | 98                           | 1.76     | 1.57         |

<sup>a</sup> Mean ± 2 S.D. (n = 3).<sup>b</sup> Recovery (%) = (Found value/Declared value)×100.<sup>c</sup> µg/kg<sup>d</sup> Not determined.

**Table S3.**

Analyte and isotopes, cell mode, normalized calibration slopes (NCS, L  $\mu\text{g}^{-1}$ ), and detection limits of the method (MLODs,  $\mu\text{g kg}^{-1}$ ) with the use of Rh as internal standard.

| Element         | Isotope | Cell mode | NCS                  | MLOD <sup>c</sup> |
|-----------------|---------|-----------|----------------------|-------------------|
| Al              | 27      | He        | $2.5 \times 10^{-5}$ | 349               |
| As              | 75      | HE He     | $5.2 \times 10^{-4}$ | 15                |
| Cd              | 111     | No gas    | $5.4 \times 10^{-3}$ | 0.24              |
| Cr              | 52      | He        | $6.7 \times 10^{-3}$ | 0.55              |
| Cu              | 63      | He        | $1.6 \times 10^{-2}$ | 6.8               |
| Fe              | 56      | He        | $4.5 \times 10^{-3}$ | 15                |
| Hg <sup>a</sup> | –       | –         | $2.8 \times 10^{-2}$ | 0.2               |
| Ni              | 60      | He        | $4.9 \times 10^{-3}$ | 4.4               |
| Pb <sup>b</sup> | b       | No gas    | $3.8 \times 10^{-2}$ | 0.70              |
| Sn              | 118     | No gas    | $1.5 \times 10^{-2}$ | 1.0               |
| U               | 238     | No gas    | $3.1 \times 10^{-2}$ | 0.074             |
| Zn              | 66      | No gas    | $5.9 \times 10^{-3}$ | 68                |

<sup>a</sup> Values were evaluated for direct analysis of Hg by single purpose atomic absorption spectrometer AMA 254.

<sup>b</sup> Pb is measured as the sum of the three most abundant isotopes,  $^{206}\text{Pb}^+$ ,  $^{207}\text{Pb}^+$  and  $^{208}\text{Pb}^+$ .

<sup>c</sup> Detection limits are corrected for initial sample weight and final volume and reflect the actual concentration in the undigested freeze-dried samples.

**Table S4.**

Upper Bound concentrations (mg  $\text{kg}^{-1}$  wet weight) of TMMs in muscle and liver tissue of 80 Italian heavy pigs obtained by ICP-MS and Mercury Analyzer (*i*Hg).

| Element     | Muscles          |                 |          |                 |                  | Livers           |                 |         |                 |                  |
|-------------|------------------|-----------------|----------|-----------------|------------------|------------------|-----------------|---------|-----------------|------------------|
|             | Min <sup>a</sup> | Q1 <sup>b</sup> | Median   | Q3 <sup>b</sup> | Max <sup>a</sup> | Min <sup>a</sup> | Q1 <sup>b</sup> | Median  | Q3 <sup>b</sup> | Max <sup>a</sup> |
| Al          | 0.15             | 0.26            | 0.36     | 0.50            | 2.4              | 0.23             | 0.32            | 0.41    | 0.60            | 4.3              |
| <i>i</i> As | 0.0010           | 0.0040          | 0.0063   | 0.013           | 0.20             | 0.0033           | 0.0077          | 0.011   | 0.013           | 0.024            |
| Cd          | 0.00027          | 0.00053         | 0.00068  | 0.00090         | 0.0022           | 0.016            | 0.029           | 0.042   | 0.055           | 0.097            |
| Cr          | 0.012            | 0.029           | 0.047    | 0.12            | 1.1              | 0.018            | 0.026           | 0.042   | 0.089           | 0.55             |
| Cu          | 0.53             | 1.03            | 1.3      | 1.5             | 8.3              | 4.2              | 7.6             | 12      | 16              | 41               |
| Fe          | 10               | 18              | 23       | 26              | 45               | 46               | 115             | 150     | 191             | 392              |
| <i>i</i> Hg | 0.0012           | 0.0019          | 0.0033   | 0.0055          | 0.027            | 0.0016           | 0.0032          | 0.0049  | 0.0065          | 0.013            |
| Ni          | 0.0051           | 0.013           | 0.017    | 0.025           | 0.079            | 0.0048           | 0.014           | 0.018   | 0.026           | 0.050            |
| Pb          | 0.0011           | 0.0019          | 0.0026   | 0.0040          | 0.015            | 0.0030           | 0.0050          | 0.0059  | 0.0077          | 0.048            |
| Sn          | 0.00018          | 0.00060         | 0.00099  | 0.0015          | 0.0032           | 0.00028          | 0.00030         | 0.00064 | 0.0014          | 0.015            |
| U           | 0.000017         | 0.000037        | 0.000048 | 0.000065        | 0.00025          | 0.000043         | 0.00019         | 0.00033 | 0.00090         | 0.0041           |
| Zn          | 19               | 30              | 38       | 40              | 53               | 30               | 49              | 58      | 66              | 87               |

<sup>a</sup> Min–Max: minimum and maximum values found.

<sup>b</sup> Q1–Q3: first (25<sup>th</sup> percentile) and third (75<sup>th</sup> percentile) quartiles.
